# Supplementary material for: Ursolic Acid Protects Sodium Dodecyl Sulfate-Induced Drosophila Ulcerative Colitis Model by Inhibiting the JNK Signaling
Source: MDPI journal article supplement (doi:10.3390/antiox11020426), 2022-02-21
Supplement: s1 [file s1]

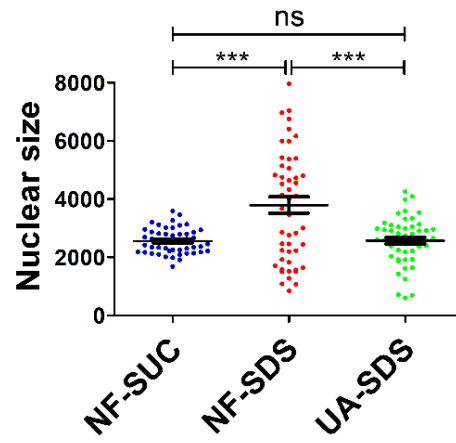

**Figure S1.** UA significantly restored SDS-induced nuclear enlargement. The UC model group (NF-SDS) enlarged nucleus size than control group (NF-SUC). 100  $\mu$ M UA supplementation significantly rescued the SDS-induced aberrant nucleus morphology ( $n \geq 50$ ). \*\*\* $p < 0.01$ , ns: no significant.
